# Supplementary material
Source: PubMed Central journal article supplement (PMC3092162)
Supplement: NIHMS246662-supplement-1_si_001.pdf [file NIHMS246662-supplement-1_si_001.pdf]

# Hydrosilation of Carbonyl-Containing Substrates Catalyzed by an Electrophilic $\eta^1$ -Silane Iridium(III) Complex

Sehoon Park and Maurice Brookhart\*

*Department of Chemistry, University of North Carolina at Chapel Hill, Chapel Hill, North  
Carolina 27599-3290*

## Supporting Information

**Hydrosilation of Acetone by 1 (Table 1, entry 1).**  $^1\text{H}$  NMR ( $\text{C}_6\text{D}_5\text{Cl}$ ):  $\delta$  4.12 (septet,  $J = 6$  Hz, 1H); 1.28 (d,  $J = 6$  Hz, 6 H); 1.14 (m, 9H, overlapped with  $\text{Et}_3\text{SiH}$ ); 0.75 (m, 6H, overlapped with  $\text{Et}_3\text{SiH}$ ).  $^{13}\text{C}\{^1\text{H}\}$  NMR ( $\text{C}_6\text{D}_5\text{Cl}$ ):  $\delta$  64.5, 25.8, 6.7, 5.1.

**Hydrosilation of 2,4-Dimethyl-3-pentanone by 1 (Table 1, entry 2).**  $^1\text{H}$  NMR ( $\text{C}_6\text{D}_5\text{Cl}$ ):  $\delta$  3.39 (t,  $J = 6.5$  Hz, 1H); 1.96 (dq, 2 H); 1.23 (m, 9 H); 0.90-0.86 (m, 18 H).  $^{13}\text{C}\{^1\text{H}\}$  NMR ( $\text{C}_6\text{D}_5\text{Cl}$ ):  $\delta$  83.0, 31.7, 20.4, 17.9, 7.3, 5.9.

**Hydrosilation of 3,3-Dimethyl-2-butanone by 1 (Table 1, entry 3).**  $^1\text{H}$  NMR ( $\text{C}_6\text{D}_5\text{Cl}$ ):  $\delta$  3.62 (q,  $J = 8$  Hz, 1H); 1.22 (d,  $J = 8$  Hz, 3 H); 1.05 (s, 9H).  $^{13}\text{C}\{^1\text{H}\}$  NMR ( $\text{C}_6\text{D}_5\text{Cl}$ ):  $\delta$  76.0, 35.4, 25.6, 18.4, 6.9, 5.3.

**Hydrosilation of Acetophenone by 1 (Table 1, entry 5).**  $^1\text{H}$  NMR ( $\text{C}_6\text{D}_5\text{Cl}$ ):  $\delta$  7.52-7.31 (m, 5H, overlapped with solvent peaks), 5.05 (q,  $J = 8$  Hz, 1H); 1.59 (d,  $J = 8$  Hz, 3 H); 1.15 (m, 9H, overlapped with  $\text{Et}_3\text{SiH}$ ); 0.80 (m, 6H, overlapped with  $\text{Et}_3\text{SiH}$ ).  $^{13}\text{C}\{^1\text{H}\}$  NMR ( $\text{C}_6\text{D}_5\text{Cl}$ ):  $\delta$  147.1, 128.1, 126.8, 125.2, 70.9, 27.4, 6.8, 5.1.

**Hydrosilation of Benzaldehyde by 1 (Table 1, entry 7).**  $^1\text{H}$  NMR ( $\text{C}_6\text{D}_5\text{Cl}$ ):  $\delta$  7.56-7.41 (m, 5H, overlapped with solvent peaks), 4.68 (s, 2H); 1.59 (d,  $J = 8$  Hz, 3 H); 1.15 (m, 9H, overlapped with  $\text{Et}_3\text{SiH}$ ); 0.80 (m, 6H, overlapped with  $\text{Et}_3\text{SiH}$ ).  $^{13}\text{C}\{^1\text{H}\}$  NMR ( $\text{C}_6\text{D}_5\text{Cl}$ ):  $\delta$  138.9, 128.5, 127.7, 127.6, 72.2, 7.1, 6.8.

**Hydrosilation of Ethyl Acetate by 1 (Table 1, entry 8).**  $^1\text{H}$  NMR ( $\text{C}_6\text{D}_5\text{Cl}$ ):  $\delta$  3.79 (q,  $J = 7$  Hz, 2H,  $\text{CH}_3\text{CH}_2\text{OSiEt}_3$ ); 3.52 (q,  $J = 8$  Hz, 4 H,  $\text{CH}_3\text{CH}_2\text{OCH}_2\text{CH}_3$ ); 1.30 (m, 3H,  $\text{CH}_3\text{CH}_2\text{OSiEt}_3$ , overlapped with  $-\text{OSiEt}_3$ ); 1.15 (m, 6H,  $\text{CH}_3\text{CH}_2\text{OCH}_2\text{CH}_3$ , overlapped with  $\text{Et}_3\text{SiH}$  and  $-\text{OSiEt}_3$ ); 0.70 (m,  $-\text{OSiEt}_3$ , overlapped with  $\text{Et}_3\text{SiH}$ ).  $^{13}\text{C}\{^1\text{H}\}$  NMR ( $\text{C}_6\text{D}_5\text{Cl}$ ):  $\delta$  65.6 ( $\text{CH}_3\text{CH}_2\text{OCH}_2\text{CH}_3$ ), 58.1 ( $\text{CH}_3\text{CH}_2\text{OSiEt}_3$ ), 18.6 ( $\text{CH}_3\text{CH}_2\text{OSiEt}_3$ ), 15.1 ( $\text{CH}_3\text{CH}_2\text{OCH}_2\text{CH}_3$ ), 6.9, 6.8, 4.7, 4.4 ( $-\text{OSiEt}_3$ ).

**Hydrosilation of Methyl Isobutanoate by 1 (Table 1, entry 9).**  $^1\text{H}$  NMR ( $\text{C}_6\text{D}_5\text{Cl}$ ):  $\delta$  3.52 (s, 3H,  $\text{MeOSiEt}_3$ ), 3.50 (d, 2H,  $\text{Me}_2\text{CHCH}_2\text{OSiEt}_3$ ), 1.86 (m,  $J = 6.8$  Hz, 1H,  $\text{Me}_2\text{CHCH}_2\text{OSiEt}_3$ ); 1.05 (d,  $J = 6.8$  Hz, 6H,  $\text{Me}_2\text{CHCH}_2\text{OSiEt}_3$ ); 1.15 (m, 18H,  $-\text{OSiEt}_3$ , overlapped with  $\text{Et}_3\text{SiH}$ ); 0.70 (m, 12H,  $-\text{OSiEt}_3$ , overlapped with  $\text{Et}_3\text{SiH}$ ).  $^{13}\text{C}\{^1\text{H}\}$  NMR ( $\text{C}_6\text{D}_5\text{Cl}$ ):  $\delta$  69.4 ( $\text{Me}_2\text{CHCH}_2\text{OSiEt}_3$ ), 50.0 ( $\text{MeOSiEt}_3$ ), 31.1 ( $\text{Me}_2\text{CHCH}_2\text{OSiEt}_3$ ), 18.8 ( $\text{Me}_2\text{CHCH}_2\text{OSiEt}_3$ ), 6.6, 6.5, 4.6, 4.3 ( $-\text{OSiEt}_3$ ).

**Hydrosilation of Ethyl Trifluoroacetate by 1 (Table 1, entry 10).**  $^1\text{H}$  NMR ( $\text{C}_6\text{D}_5\text{Cl}$ ):  $\delta$  5.02 (q,  $J = 3.6$  Hz, 1H), 3.84 (m, 1H), 3.73 (m, 1H), 1.15 (m, 12H, overlapped with  $\text{Et}_3\text{SiH}$ ), 0.75 (m,

6H, overlapped with Et<sub>3</sub>SiH). <sup>13</sup>C{<sup>1</sup>H} NMR (C<sub>6</sub>D<sub>5</sub>Cl): δ 123.6 (q, *J*<sub>C-F</sub> = 1132 Hz), 92.8 (q, *J*<sub>C-F</sub> = 144 Hz), 63.4, 14.7, 6.1, 4.8.

**Hydrosilation of *N,N*-Diethyl Acetamide by 1 (Table 1, entry 11).** <sup>1</sup>H NMR (C<sub>6</sub>D<sub>5</sub>Cl): δ 2.56 (q, *J* = 7 Hz, 6H), 1.10 (t, 9H, overlapped with Et<sub>3</sub>SiH), 1.10 (m, 18H, overlapped with Et<sub>3</sub>SiH), 0.75 (m, 12H, overlapped with Et<sub>3</sub>SiH). <sup>13</sup>C{<sup>1</sup>H} NMR (C<sub>6</sub>D<sub>5</sub>Cl): δ 46.6, 12.2, 6.6, 6.3.

**Table 2, entry 2,4-8**

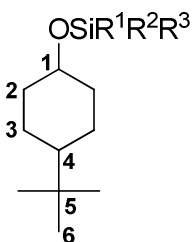

**Table 2, entry 9**

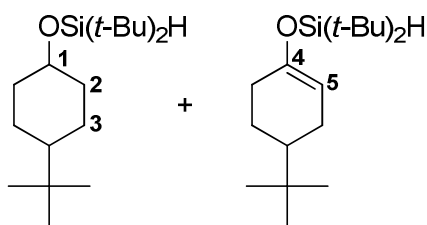

<sup>1</sup>H NMR (C<sub>6</sub>D<sub>5</sub>Cl, **Table 2, entry 2**): δ 0.1-2.1 (m, 29H, β, γ, δ-H, *t*-Bu, and OSiMe<sub>2</sub>Et, overlapped with EtMe<sub>2</sub>SiH), 3.63 (m, 0.69H, axial-α-H), and 4.09 (m, 0.31H, equatorial-α-H, overlapped with solvent peaks). <sup>13</sup>C{<sup>1</sup>H} NMR (C<sub>6</sub>D<sub>5</sub>Cl): δ -2.3, -2.0, -0.4, 6.6, 8.8, and 10.1 (s, OSiMe<sub>2</sub>Et), 21.1, 25.9, 27.5, 32.1, 32.5, 34.4, 36.7, 47.4, 48.3 (C2-6), 66.2, 71.6 (C1). <sup>1</sup>H NMR (C<sub>6</sub>D<sub>5</sub>Cl, **Table 2, entry 4**, characteristic signals): δ 3.65 (m, 0.74H, axial-α-H), and 4.12 (m, 0.26H, equatorial-α-H). <sup>13</sup>C{<sup>1</sup>H} NMR (C<sub>6</sub>D<sub>5</sub>Cl, characteristic signals): δ 21.1, 26.0, 27.5, 27.6, 32.1, 32.5, 34.5, 36.8, 47.5, 48.3 (C2-6), 66.3, 71.8 (C1). <sup>1</sup>H NMR (C<sub>6</sub>D<sub>5</sub>Cl, **Table 2, entry 5**, characteristic signals): δ 3.55 (m, 0.68H, axial-α-H), and 4.02 (m, 0.32H, equatorial-α-H). <sup>13</sup>C{<sup>1</sup>H} NMR (C<sub>6</sub>D<sub>5</sub>Cl, characteristic signals): δ 21.0, 25.8, 27.3, 27.4, 32.0, 32.4, 34.4, 36.7, 47.4, 48.1 (C2-6), 66.0, 71.5 (C1). <sup>1</sup>H NMR (C<sub>6</sub>D<sub>5</sub>Cl, **Table 2, entry 6**, characteristic signals): δ 3.69 (m, 0.76H, axial-α-H), and 4.14 (m, 0.24H, equatorial-α-H). <sup>13</sup>C{<sup>1</sup>H} NMR (C<sub>6</sub>D<sub>5</sub>Cl, characteristic signals): δ 21.1, 26.0, 27.6, 27.8, 32.2, 32.5, 34.4, 36.8, 47.5, 48.2 (C2-6), 66.3,

71.9 (C1).  $^1\text{H}$  NMR ( $\text{C}_6\text{D}_5\text{Cl}$ , **Table 2, entry 7**, characteristic signals):  $\delta$  3.63 (m, 0.87H, axial- $\alpha$ -H), and 4.11 (m, 0.13H, equatorial- $\alpha$ -H).  $^{13}\text{C}\{^1\text{H}\}$  NMR ( $\text{C}_6\text{D}_5\text{Cl}$ , characteristic signals):  $\delta$  21.0, 25.9, 27.5, 27.7, 32.2, 32.6, 34.3, 36.7, 47.5, 48.0 (C2-6), 66.3, 71.9 (C1).  $^1\text{H}$  NMR ( $\text{C}_6\text{D}_5\text{Cl}$ , **Table 2, entry 8**, characteristic signals):  $\delta$  3.76 (m, 0.51H, axial- $\alpha$ -H), and 4.24 (m, 0.49H, equatorial- $\alpha$ -H).  $^{13}\text{C}\{^1\text{H}\}$  NMR ( $\text{C}_6\text{D}_5\text{Cl}$ , characteristic signals):  $\delta$  21.0, 26.0, 27.5, 27.7, 32.2, 32.6, 34.5, 37.0, 47.5, 48.1 (C2-6), 66.5, 72.0 (C1).  $^1\text{H}$  NMR ( $\text{C}_6\text{D}_5\text{Cl}$ , **Table 2, entry 9**):  $\delta$  0.8-2.4 (m, 37H,  $\beta$ ,  $\gamma$ ,  $\delta$ -H, *t*-Bu, and  $\text{OSi}(t\text{-Bu})_2\text{H}$  overlapped with  $(t\text{-Bu})_2\text{SiH}_2$ ), 3.70 (m, 0.57H, axial- $\alpha$ -H, overlapped with  $(t\text{-Bu})_2\text{SiH}_2$ ), 4.22 (m, 0.43H, equatorial- $\alpha$ -H), 4.28 (s, 1H,  $\text{OSi}(t\text{-Bu})_2\text{H}$ ), 4.49 (s, 1H,  $=\text{C}-\text{OSi}(t\text{-Bu})_2\text{H}$ ), and 5.10 (d, 1H,  $\text{HC}=\text{C}-\text{OSi}(t\text{-Bu})_2\text{H}$ ).  $^{13}\text{C}\{^1\text{H}\}$  NMR ( $\text{C}_6\text{D}_5\text{Cl}$ , characteristic signals):  $\delta$  36.1, 33.5, 48.0, 47.5 (C2, C3), 74.9, 69.5 (C1), 151.6 (C4), 102.2 (C5).

**Table 4, entry 1**

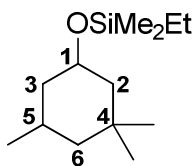

**Table 4, entry 2**

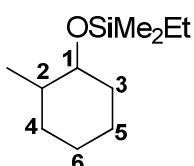

**Table 4, entry 3**

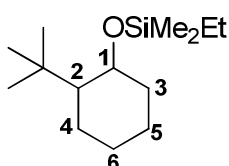

**Table 4, entry 4**

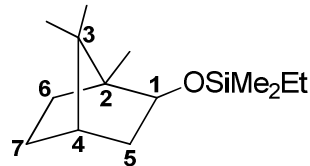

**Hydrosilation of 3,3,5-Trimethyl Cyclohexanone by 1 (Table 4, entry 1).**  $^1\text{H}$  NMR ( $\text{C}_6\text{D}_5\text{Cl}$ , characteristic signals):  $\delta$  4.23 (m, 0.86H, equatorial- $\alpha$ -H), 4.12 (m, 0.14H, axial- $\alpha$ -H, overlapped with  $\text{EtMe}_2\text{SiH}$ ), 2.30-1.35 (m, 4H,  $\beta$ -Hs).  $^{13}\text{C}\{^1\text{H}\}$  NMR ( $\text{C}_6\text{D}_5\text{Cl}$ , characteristic signals):  $\delta$  70.2, 68.2 (C1), 48.8, 47.6 (C2), 45.1, 44.9, 42.5, 34.0, 33.0, 32.0, 30.8, 27.8, 27.2, 22.8, 22.4, 22.1 (C3-6, Me).

**Hydrosilation of 2-Methyl Cyclohexanone by 1 (Table 4, entry 2).**  $^1\text{H}$  NMR ( $\text{C}_6\text{D}_5\text{Cl}$ , characteristic signals):  $\delta$  3.88 (m, 0.71H, equatorial- $\alpha$ -H), 3.28 (m, 0.29H, axial- $\alpha$ -H), 2.20-1.10 (m, 9H, H2-6, overlapped with  $\text{EtMe}_2\text{SiH}$ ), 1.04 (d, 3H, Me).  $^{13}\text{C}\{^1\text{H}\}$  NMR ( $\text{C}_6\text{D}_5\text{Cl}$ , characteristic signals):  $\delta$  77.0, 71.4 (C1), 40.5, 37.0 (C2), 36.3, 35.6 (C3), 33.8, 33.7 (C4), 28.9, 25.9, 25.3, 20.6 (C5-6), 19.1, 17.9 (Me).

**Hydrosilation of 2-*tert*-Butyl Cyclohexanone by 1 (Table 4, entry 3).**  $^1\text{H}$  NMR ( $\text{C}_6\text{D}_5\text{Cl}$ , characteristic signals):  $\delta$  4.43 (m, 0.76H, equatorial- $\alpha$ -H), 3.73 (m, 0.24H, axial- $\alpha$ -H), 2.20-1.00 (m, 18H, H2-6 and t-Bu, overlapped with  $\text{EtMe}_2\text{SiH}$ ).  $^{13}\text{C}\{^1\text{H}\}$  NMR ( $\text{C}_6\text{D}_5\text{Cl}$ , characteristic signals):  $\delta$  74.8, 68.9 (C1), 53.5, 52.1 (C2), 37.8, 35.5 (C3), 32.9, 32.6 (C4), 29.2, 28.4, 27.3, 26.9, 26.5, 25.2, 21.7, 20.4 (C5-6, t-Bu).

**Hydrosilation of Camphor by 1 (Table 4, entry 4).**  $^1\text{H}$  NMR ( $\text{C}_6\text{D}_5\text{Cl}$ , characteristic signals):  $\delta$  4.18 (m, 0.79H, *endo*-H), 3.73 (m, 0.21H, *exo*-H).  $^{13}\text{C}\{^1\text{H}\}$  NMR ( $\text{C}_6\text{D}_5\text{Cl}$ , characteristic signals):  $\delta$  79.8, 77.3 (C1), 49.8, 48.9 (C2), 47.4, 46.6 (C3), 45.6, 45.5 (C4), 42.4, 39.8 (C5), 34.1, 28.5, 27.6, 26.4 (C6-7), 20.6, 20.3, 18.8, 13.6, 12.0, 10.3 (Me).
